# Supplementary material for: Metabolomic Changes in Rat Serum after Chronic Exposure to Glyphosate-Based Herbicide
Source: MDPI journal article supplement (doi:10.3390/metabo14010050), 2024-01-13
Supplement: s1 [file s1]

**[Supplementary data]**

## **Metabolomics Changes in Rat Serum after Chronic Exposure to Glyphosate-Based Herbicide**

**Oluwatosin Daramola<sup>1‡</sup>, Cristian D. Gutierrez Reyes<sup>1‡</sup>, Jesús Chávez-Reyes<sup>2</sup>, Bruno A. Marichal-Cancino<sup>2</sup>, Judith Nwaiwu<sup>1</sup>, Sherifdeen Onigbinde<sup>1</sup>, Moyinoluwa Adeniyi<sup>1</sup>, Joy Solomon<sup>1</sup>, Md Mostofa Al Amin Bhuiyan<sup>1</sup>, and Yehia Mechref<sup>1\*</sup>**

1. Department of Chemistry and Biochemistry, Texas Tech University, Lubbock, TX 79409, USA.

2. Departamento de Fisiología y Farmacología, Centro de Ciencias Básicas, Universidad Autónoma de Aguascalientes, México.

\*Corresponding author

Department of Chemistry and Biochemistry

Texas Tech University

Lubbock, TX 79409-1061

Email: yehia.mechref@ttu.edu

Tel: 806-742-3059

Fax: 806-742-1289

‡ These authors contribute equally

## Table of Contents:

### Supplementary Tables:

**Supplementary Table S1:** Details on the solvents and reagents used. All solvents used for this experiment were HPLC-grade.

**Supplementary Table S2.** Metabolites with significant changes in abundance between control and GBH-exposed groups in the combined groups.

**Supplementary Table S3:** Metabolites with significant changes in abundance between control and GBH-exposed groups in the gender subgroups.

**Supplementary Table S4:** List of DEMs in the combined rat group validated by LC-PRM-MS including m/z and FC before and after PRM validation.

**Supplementary Table S5:** List of DEMs in the female rat subgroup validated by LC-PRM-MS including m/z and FC before and after PRM validation.

**Supplementary Table S6:** List of DEMs shown to be implicated in some important diseases and functions based on IPA results.

### Supplementary Figures:

**Supplementary Figure S1.** Effect of chronic exposure to GBH on search strategy of (A) females and (B) males studied on Barnes maze (n = 6 - 7 rats/group). Results are presented as mean  $\pm$  SEM.

**Supplementary Figure S2.** Effect of chronic exposure to GBH on (A and B) total errors and (C and D) latency to solve the Barnes maze in rats (n = 6 - 7 rats/group). Results are presented as mean  $\pm$  SEM. \*p < 0.05.

**Supplementary Figure S3.** Venn shows overlapping and unique significant metabolites in the whole data set and gender comparison between control and GBH-exposed rats. The result shows two common metabolites in all comparisons, and female rats showed the most unique metabolites.

**Supplementary Figure S4.** Heatmap of significant metabolites in **A)** control and GBH-exposed groups in the combined sample group, **B)** female rat samples, and **C)** male rat samples (C\_M = Control (male); C\_F = Control (female); 100\_M = GBH-exposed (male); 100\_F = GBH-exposed (female)). The red color indicates up regulated while the green color indicates down regulated metabolites.

**Supplementary Figure S5.** A) Canonical pathways, B) Pathways network, C) Prediction legends. (Red indicates increased measurement, Green represents decreased measurement, Blue represents predicted inhibition, and Orange represents predicted activation).

**Supplementary Figure S6:** Boxplot showing the changes in the DEMs from combined group comparison between control to GBH-exposed. Five metabolites were up regulated, and one metabolite was down regulated.

**Supplementary Figure S7.** Boxplot showing the changes in the control and GBH-exposed DEMs in female rats. Four metabolites were up regulated, and one metabolite was down regulated.

**Supplementary Table S1:** List of all identified metabolites.

**Supplementary Table S1:** Details on the solvents and reagents used. All solvents used for this experiment were HPLC-grade.

| <b>Solvents/Reagents</b> | <b>Catalog number</b> | <b>Lot number</b> | <b>Concentration Used</b> | <b>Vendor</b>                                        |
|--------------------------|-----------------------|-------------------|---------------------------|------------------------------------------------------|
| Methanol                 | A412-4                | 232680            | 100%                      | Fisher Scientific (Fair Lawn, NJ)                    |
| Acetonitrile             | A998SK-4              | 220848            | 100%                      | Fisher Scientific (Fair Lawn, NJ)                    |
| Dichloromethane          | D143-4                | 223401            | 100%                      | Fisher Scientific (Fair Lawn, NJ)                    |
| Water                    | W5-4                  | 231099            | 100%                      | Fisher Scientific (Fair Lawn, NJ)                    |
| Formic Acid              | A117-50               | 225582            | 100%                      | Fisher Scientific (Fair Lawn, NJ)                    |
| Glyphosate               | -                     | DZRL0507          | 100 mg/day/rat            | Rival® herbicide from Monsanto (St. Louis, MO, USA). |
| Pentobarbital sodium     | -                     | 23105SP           | 0.063 g/mL                | Pets Pharma Ltd. (Mex. Mexico)                       |

**Supplementary Table S2:** Metabolites with significant changes in abundance between control and GBH-exposed groups in the combined groups.

| Metabolites                                                                                               | Average (Control) (%) | Average (GBH-exposed) (%) | p-value | Adjusted p-value | Fold Change |
|-----------------------------------------------------------------------------------------------------------|-----------------------|---------------------------|---------|------------------|-------------|
| (+/-)-6-Hydroxy-3-oxo-alpha-ionone                                                                        | 0.002±0.002           | 0.004±0.003               | 0.02    | 0.04             | 2.00        |
| Dibenzothiophene                                                                                          | 0.008±0.005           | 0.02±0.008                | 0.002   | 0.04             | 2.30        |
| (Z,E)-9,12-Tetradecadienyl acetate                                                                        | 0.0008±0.0006         | 0.003±0.003               | 0.003   | 0.04             | 3.45        |
| Thiomorpholine3-carboxylate                                                                               | 0.006±0.002           | 0.01±0.004                | 0.003   | 0.04             | 1.78        |
| (9S_10S)-10-Hydroxy-9-(phosphonoxy)octadecanoate                                                          | 0.006±0.003           | 0.003±0.002               | 0.003   | 0.04             | 0.55        |
| Diethyl phthalate                                                                                         | 0.007±0.002           | 0.01±0.005                | 0.003   | 0.04             | 1.70        |
| Rishitin                                                                                                  | 0.001±0.001           | 0.002±0.0006              | 0.003   | 0.03             | 1.48        |
| Laurilsulfate                                                                                             | 0.03±0.03             | 0.07±0.02                 | 0.004   | 0.04             | 2.15        |
| Methyl 3,5-ditert-butyl-4-hydroxybenzoate                                                                 | 0.003±0.0009          | 0.002±0.0007              | 0.005   | 0.04             | 0.68        |
| Abieticacid                                                                                               | 0.0003±0.0003         | 0.006±0.01                | 0.006   | 0.04             | 21.78       |
| L-(+)-Arginine                                                                                            | 0.05±0.05             | 0.1±0.1                   | 0.006   | 0.04             | 3.03        |
| (9S_10S)-9_10-Dihydroxyoctadecanoate                                                                      | 0.001±0.0005          | 0.002±0.0007              | 0.007   | 0.04             | 1.75        |
| 2,3,4,5-tetrachloro-4'-biphenylol                                                                         | 0.002±0.0004          | 0.003±0.0005              | 0.007   | 0.04             | 1.24        |
| Androst-4-en-3-one                                                                                        | 0.0006±0.0003         | 0.004±0.006               | 0.007   | 0.04             | 6.57        |
| Falcarindiol                                                                                              | 0.002±0.0009          | 0.003±0.001               | 0.007   | 0.04             | 1.44        |
| (2E)-2-(hydroxymethyl)-3-[3-oxo-5-(propan-2-yl)-1,3,4,5,6,7-hexahydro-2-benzofuran-4-yl]prop-2-enoic acid | 0.005±0.002           | 0.003±0.002               | 0.008   | 0.04             | 0.54        |
| Glycidyl Stearate                                                                                         | 0.004±0.002           | 0.002±0.001               | 0.008   | 0.04             | 0.45        |
| (2S)-Flavan-4-ol                                                                                          | 0.0002±0.0002         | 0.004±0.008               | 0.009   | 0.04             | 18.45       |
| Deoxycholic Acid                                                                                          | 0.03±0.01             | 0.01±0.007                | 0.009   | 0.04             | 0.50        |
| Rehmaionoside C                                                                                           | 0.003±0.002           | 0.001±0.0007              | 0.009   | 0.04             | 0.50        |
| Sulbenox                                                                                                  | 0.0001±0.00007        | 0.0005±0.0009             | 0.01    | 0.04             | 3.98        |
| [FA(20:4)]17R_18S-epoxy-5Z_8Z_11Z_14Z-eicosatetraenoicacid                                                | 0.01±0.02             | 0.02±0.01                 | 0.01    | 0.04             | 1.52        |
| Choline                                                                                                   | 1±0.2                 | 1.2±0.2                   | 0.01    | 0.04             | 1.20        |
| [FA(20:4)]5Z_8Z_11Z_14Z-eicosatetraenoicacid                                                              | 0.009±0.01            | 0.03±0.02                 | 0.02    | 0.04             | 2.82        |
| 1,2-dihydroxyheptadec-16-yn-4-yl acetate                                                                  | 0.002±0.001           | 0.01±0.008                | 0.02    | 0.04             | 4.14        |
| Forskolin                                                                                                 | 0.0004±0.0004         | 0.0009±0.0006             | 0.02    | 0.04             | 2.36        |
| L-N2-(2-Carboxyethyl)arginine                                                                             | 0.003±0.003           | 0.007±0.004               | 0.02    | 0.04             | 2.24        |
| L-Octanoylcarnitine                                                                                       | 0.0002±0.0004         | 0.0006±0.0006             | 0.02    | 0.04             | 2.53        |
| VIRILON                                                                                                   | 0.0007±0.0003         | 0.001±0.0004              | 0.02    | 0.04             | 1.52        |

| Metabolites                                      | Average<br>(Control) (%) | Average<br>(GBH-<br>exposed) (%) | p-value | Adjusted<br>p-value | Fold<br>Change |
|--------------------------------------------------|--------------------------|----------------------------------|---------|---------------------|----------------|
| 3alpha_11beta-Dihydroxy-5alpha-androstane-17-one | 0.0009±0.002             | 0.002±0.001                      | 0.02    | 0.04                | 2.12           |
| 5-Ethyl-3,8-dimethyl-1,7-dihydroazulene          | 0.002±0.001              | 0.002±0.0007                     | 0.02    | 0.04                | 1.30           |
| 9-cis-Retinoicacid                               | 0.004±0.002              | 0.02±0.03                        | 0.02    | 0.04                | 5.07           |
| Dihydrokavain                                    | 0.0003±0.0007            | 0.0003±0.0003                    | 0.02    | 0.04                | 1.05           |
| Glycerol                                         | 0.003±0.001              | 0.005±0.002                      | 0.02    | 0.04                | 1.61           |
| 4-Hydroxy-3-(sulfooxy)benzoic acid               | 0.003±0.004              | 0.008±0.007                      | 0.02    | 0.04                | 2.87           |
| dehydroretinaldehyde                             | 0.002±0.0009             | 0.004±0.002                      | 0.02    | 0.04                | 1.71           |
| Desonide                                         | 0.002±0.004              | 0.003±0.002                      | 0.02    | 0.04                | 1.27           |
| N_N-Dimethylsphing-4-enine                       | 0.0002±0.00007           | 0.0007±0.001                     | 0.02    | 0.04                | 3.62           |
| N-Carbamoylputrescine                            | 0.0004±0.0003            | 0.0008±0.0005                    | 0.02    | 0.04                | 2.09           |
| (2E)-2-Tridecene-4,6,8-triyn-1-ol                | 0.007±0.003              | 0.01±0.004                       | 0.02    | 0.04                | 1.43           |
| D-Arginine                                       | 0.006±0.005              | 0.01±0.008                       | 0.02    | 0.04                | 2.10           |
| Promegestone                                     | 0.3±0.2                  | 0.4±0.1                          | 0.02    | 0.04                | 1.47           |
| Ubiquinone-1(CoQ1)                               | 0.002±0.001              | 0.04±0.1                         | 0.02    | 0.04                | 22.09          |
| 1_7-Dimethylxanthine(paraxanthine)               | 0.0005±0.0007            | 0.0006±0.0006                    | 0.03    | 0.04                | 1.23           |
| 3-hydroxy-3-methylpentanedioic acid              | 0.02±0.01                | 0.03±0.03                        | 0.03    | 0.04                | 2.05           |
| 9_12-Dioxododecanoicacid                         | 0.001±0.0004             | 0.002±0.0004                     | 0.03    | 0.04                | 1.29           |
| cis-3-Hexenyl phenylacetate                      | 0.008±0.003              | 0.01±0.01                        | 0.03    | 0.04                | 1.96           |
| ibufenac                                         | 0.0002±0.0001            | 0.0009±0.001                     | 0.03    | 0.04                | 4.10           |
| oxeladin                                         | 0.0007±0.0004            | 0.001±0.0006                     | 0.03    | 0.04                | 1.63           |
| 12-oxo Phytodienoic Acid                         | 0.004±0.002              | 0.006±0.003                      | 0.03    | 0.04                | 1.62           |
| 2-Dodecylbenzenesulfonic acid                    | 0.1±0.07                 | 0.2±0.09                         | 0.03    | 0.04                | 1.91           |
| 5-Methylcytosine                                 | 0.06±0.02                | 0.08±0.03                        | 0.03    | 0.04                | 1.39           |
| 5-O-methyl embelin                               | 0.004±0.002              | 0.004±0.001                      | 0.03    | 0.04                | 1.15           |
| Benzylideneacetone                               | 0.007±0.003              | 0.01±0.004                       | 0.03    | 0.04                | 1.43           |
| chavicol                                         | 0.02±0.002               | 0.02±0.004                       | 0.03    | 0.04                | 1.16           |
| DAPSONE HYDROXYLAMINE                            | 0.001±0.003              | 0.006±0.008                      | 0.03    | 0.04                | 4.81           |
| Michler's ketone                                 | 0.00003±0.00004          | 0.001±0.004                      | 0.03    | 0.04                | 43.07          |
| R.g.-Keto III                                    | 0.009±0.006              | 0.01±0.008                       | 0.03    | 0.04                | 1.54           |
| 19-Oxoandrost-4-ene-3_17-dione                   | 0.0003±0.0002            | 0.0009±0.0009                    | 0.04    | 0.04                | 3.35           |
| 2,6-Di-iso-propylnaphthalene                     | 0.002±0.0009             | 0.003±0.001                      | 0.04    | 0.04                | 1.56           |
| 235BBF3K97                                       | 0.001±0.0004             | 0.002±0.0007                     | 0.04    | 0.04                | 1.43           |
| 3-oxopalmitic acid                               | 0.001±0.0004             | 0.002±0.0004                     | 0.04    | 0.04                | 1.28           |
| Auraptene                                        | 0.0004±0.0002            | 0.0008±0.0007                    | 0.04    | 0.04                | 2.07           |
| D-Glutamate                                      | 0.07±0.03                | 0.1±0.06                         | 0.04    | 0.04                | 1.58           |
| Diethanolamine                                   | 0.009±0.009              | 0.05±0.07                        | 0.04    | 0.04                | 5.33           |
| 1,3-Dihydroxy-2-propanyl (9Z)-9-tetradecenoate   | 0.002±0.0006             | 0.003±0.0007                     | 0.04    | 0.04                | 1.23           |

| Metabolites                 | Average<br>(Control) (%) | Average<br>(GBH-<br>exposed) (%) | p-value | Adjusted<br>p-value | Fold<br>Change |
|-----------------------------|--------------------------|----------------------------------|---------|---------------------|----------------|
| 1_4-Lactone                 | 0.01±0.002               | 0.01±0.004                       | 0.04    | 0.04                | 1.21           |
| 2,6-<br>DIMETHYLNAPHTHALENE | 0.001±0.0004             | 0.002±0.0006                     | 0.04    | 0.04                | 1.40           |
| Fenestrel                   | 0.0006±0.0001            | 0.0007±0.0002                    | 0.04    | 0.04                | 1.26           |
| Piperidine                  | 1.7±0.2                  | 1.8±0.2                          | 0.04    | 0.04                | 1.10           |
| Xanthine                    | 0.003±0.2                | 0.02±0.2                         | 0.04    | 0.04                | 0.52           |

**Supplementary Table S3:** Metabolites with significant changes in abundance between control and GBH-exposed groups in the gender subgroups.

| Metabolites                                                                                                  | Average (Control) (%) | Average (GBH-exposed) (%) | p-value | Adjusted p-value | Fold Change |
|--------------------------------------------------------------------------------------------------------------|-----------------------|---------------------------|---------|------------------|-------------|
| Piperonyl sulfoxide                                                                                          | 0.00007±0.00007       | 0.0006±0.0003             | 0.004   | 0.03             | 8.11        |
| Hydroxyanthraquinone                                                                                         | 0.0008±0.0002         | 0.001±0.0004              | 0.004   | 0.03             | 1.84        |
| butalbital                                                                                                   | 0.01±0.01             | 0.0004±0.00009            | 0.004   | 0.04             | 0.03        |
| Amobarbital                                                                                                  | 0.06±0.07             | 0.0004±0.0002             | 0.004   | 0.04             | 0.01        |
| Abietic acid                                                                                                 | 0.0003±0.0002         | 0.01±0.01                 | 0.004   | 0.04             | 36.47       |
| Piceid                                                                                                       | 0.0005±0.0003         | 0.005±0.01                | 0.007   | 0.03             | 11.25       |
| Gibberellin A14                                                                                              | 0.0002±0.00007        | 0.001±0.001               | 0.007   | 0.03             | 4.32        |
| Gibberellin A12                                                                                              | 0.0007±0.0004         | 0.002±0.003               | 0.007   | 0.03             | 3.45        |
| 5-Methylcytosine                                                                                             | 0.07±0.009            | 0.1±0.02                  | 0.007   | 0.03             | 1.42        |
| 5-Ethyl-3,8-dimethyl-1,7-dihydroazulene                                                                      | 0.001±0.0002          | 0.002±0.0004              | 0.007   | 0.03             | 1.53        |
| 4-(2-Hydroxyethyl)phenyl hydrogen sulfate                                                                    | 0.005±0.002           | 0.001±0.0006              | 0.007   | 0.03             | 0.29        |
| 1,7-Dimethylxanthine (paraxanthine)                                                                          | 0.0001±0.00006        | 0.0003±0.0001             | 0.007   | 0.03             | 2.31        |
| (Z,E)-9,12-Tetradecadienyl acetate                                                                           | 0.0007±0.0003         | 0.004±0.004               | 0.007   | 0.04             | 5.43        |
| (9S,10S)-10-Hydroxy-9-(phosphonooxy)octadecanoate                                                            | 0.007±0.003           | 0.004±0.001               | 0.007   | 0.04             | 0.49        |
| (4R,5S,9S,10R,12S,13S)-1,5,9-Trimethyl-11,14,15,16-tetraoxatetracyclo[10.3.1.0~4,13~.0~8,13~]hexadecan-10-ol | 0.0001±0.00004        | 0.0005±0.0006             | 0.007   | 0.04             | 4.10        |
| Dihydrokavain                                                                                                | 0.0001±0.00004        | 0.0003±0.0001             | 0.007   | 0.04             | 2.57        |
| (2S)-Flavan-4-ol                                                                                             | 0.0003±0.0003         | 0.006±0.01                | 0.007   | 0.04             | 22.93       |
| Rishitin                                                                                                     | 0.0009±0.0002         | 0.001±0.0005              | 0.01    | 0.02             | 1.7         |
| Nobiletin                                                                                                    | 0.0008±0.0006         | 0.02±0.03                 | 0.01    | 0.03             | 22.41       |
| n-Butyl lactate                                                                                              | 0.0009±0.00007        | 0.001±0.0004              | 0.01    | 0.03             | 1.45        |
| L-gamma-Glutamyl-L-leucine                                                                                   | 0.009±0.009           | 0.0001±0.00006            | 0.01    | 0.03             | 0.01        |
| L-(+)-Arginine                                                                                               | 0.06±0.07             | 0.2±0.09                  | 0.01    | 0.03             | 3.09        |
| Homoarginine                                                                                                 | 0.004±0.0003          | 0.005±0.0006              | 0.01    | 0.03             | 1.27        |
| Falcarindiol                                                                                                 | 0.002±0.0002          | 0.003±0.0007              | 0.01    | 0.03             | 1.46        |
| azarole                                                                                                      | 0.0004±0.00008        | 0.0006±0.0002             | 0.01    | 0.03             | 1.53        |
| apronalide                                                                                                   | 0.002±0.0006          | 0.004±0.002               | 0.01    | 0.03             | 2.05        |
| Androst-4-en-3-one                                                                                           | 0.0005±0.0002         | 0.005±0.007               | 0.01    | 0.03             | 9.82        |
| 9-cis-Retinoic acid                                                                                          | 0.005±0.002           | 0.03±0.04                 | 0.01    | 0.03             | 6.76        |
| 3,4-Dihydroxybenzenesulfonic acid                                                                            | 0.02±0.008            | 0.007±0.008               | 0.01    | 0.03             | 0.28        |
| 1,4-dihydroxy-1,4-dimethyl-7-(propan-2-ylidene)-decahydroazulen-6-one                                        | 0.002±0.0003          | 0.003±0.0008              | 0.01    | 0.03             | 1.42        |



| Metabolites                                            | Average (Control) (%) | Average (GBH-exposed)) (%) | p-value | Adjusted p-value | Fold Change |
|--------------------------------------------------------|-----------------------|----------------------------|---------|------------------|-------------|
| [STox]3-oxo-13_17-secoandrost-4-ene-17_13alpha-lactone | 0.0005±0.0002         | 0.002±0.002                | 0.01    | 0.03             | 4.74        |
| (3R)-beta-Leucine                                      | 0.002±0.0004          | 0.002±0.0006               | 0.01    | 0.04             | 1.51        |
| Thebaine                                               | 0.0002±0.00007        | 0.0003±0.00007             | 0.01    | 0.04             | 1.79        |
| Epinephrine(OrL-Adrenaline)                            | 0.0006±0.0004         | 0.0002±0.0001              | 0.01    | 0.04             | 0.29        |
| S-3-oxodecanoyl cysteamine                             | 0.02±0.03             | 0.0005±0.0003              | 0.02    | 0.03             | 0.03        |
| Valylvaline                                            | 0.002±0.002           | 0.00004±0.00002            | 0.02    | 0.03             | 0.02        |
| Promegestone                                           | 0.3±0.06              | 0.4±0.1                    | 0.02    | 0.03             | 1.53        |
| Sulcatone                                              | 0.007±0.002           | 0.01±0.009                 | 0.02    | 0.03             | 2.05        |
| Norethindrone                                          | 0.0002±0.0001         | 0.002±0.002                | 0.02    | 0.03             | 6.78        |
| Sebacicacid                                            | 0.0005±0.0004         | 0.00008±0.00002            | 0.02    | 0.03             | 0.16        |
| N-Carbamoylputrescine                                  | 0.0003±0.0003         | 0.0009±0.0004              | 0.02    | 0.03             | 2.70        |
| N_N-Dimethylsphing-4-enine                             | 0.0002±0.00005        | 0.001±0.002                | 0.02    | 0.03             | 4.73        |
| Naphthalene                                            | 0.006±0.002           | 0.008±0.001                | 0.02    | 0.03             | 1.39        |
| L-N2-(2-Carboxyethyl)arginine                          | 0.004±0.004           | 0.01±0.002                 | 0.02    | 0.03             | 2.51        |
| N1-Methyl-2-pyridone-5-carboxamide                     | 0.08±0.08             | 0.2±0.1                    | 0.02    | 0.03             | 2.39        |
| L-Octanoylcarnitine                                    | 0.0001±0.00007        | 0.0004±0.0002              | 0.02    | 0.03             | 2.63        |
| HMBA                                                   | 0.08±0.09             | 0.0009±0.0004              | 0.02    | 0.03             | 0.01        |
| L-2-Amino-3-oxobutanoicacid                            | 0.0004±0.0002         | 0.0002±0.0001              | 0.02    | 0.03             | 0.50        |
| Glycidyl Stearate                                      | 0.006±0.002           | 0.003±0.0005               | 0.02    | 0.03             | 0.44        |
| Helenalin                                              | 0.003±0.0007          | 0.002±0.0004               | 0.02    | 0.03             | 0.66        |
| Guaiazulene                                            | 0.0009±0.0001         | 0.002±0.0005               | 0.02    | 0.03             | 1.68        |
| Desonide                                               | 0.001±0.0007          | 0.003±0.0009               | 0.02    | 0.03             | 1.99        |
| dehydroretinaldehyde                                   | 0.002±0.0007          | 0.004±0.002                | 0.02    | 0.03             | 1.93        |
| D-Arginine                                             | 0.007±0.006           | 0.02±0.006                 | 0.02    | 0.03             | 2.48        |
| CYCLO(-SER-TYR)                                        | 0.0007±0.0005         | 0.00006±0.00002            | 0.02    | 0.03             | 0.08        |
| Brassylic acid                                         | 0.006±0.002           | 0.003±0.0005               | 0.02    | 0.03             | 0.48        |
| Benzylideneacetone                                     | 0.006±0.001           | 0.01±0.003                 | 0.02    | 0.03             | 1.52        |
| Androstenedione                                        | 0.0002±0.0001         | 0.0006±0.0005              | 0.02    | 0.03             | 2.60        |
| 4-Coumarylalcohol                                      | 0.0002±0.00007        | 0.0004±0.0002              | 0.02    | 0.03             | 2.56        |
| 9-Hydroxy-10-undecenoic acid                           | 0.0007±0.0003         | 0.003±0.003                | 0.02    | 0.03             | 3.85        |
| 15-Deoxy-Δ12,14-prostaglandin A1                       | 0.05±0.03             | 0.4±0.4                    | 0.02    | 0.03             | 6.79        |
| 5D-5-O-Methyl-2_3_5/4_6-pentahydroxycyclohexanone      | 0.0007±0.0003         | 0.0003±0.0001              | 0.02    | 0.03             | 0.46        |
| 4-Hydroxy-3-(sulfooxy)benzoic acid                     | 0.005±0.005           | 0.01±0.004                 | 0.02    | 0.04             | 2.54        |
| (2E)-2-Tridecene-4,6,8-triyn-1-ol                      | 0.007±0.001           | 0.01±0.003                 | 0.02    | 0.04             | 1.52        |
| 20alpha-Hydroxy-4-pregnen-3-one                        | 0.003±0.001           | 0.005±0.002                | 0.02    | 0.04             | 1.69        |
| (+)-exo-5-Hydroxycamphor                               | 0.0005±0.0005         | 0.002±0.001                | 0.02    | 0.04             | 3.00        |
| 2'_4'-Dihydroxyacetophenone                            | 0.002±0.0003          | 0.004±0.003                | 0.02    | 0.04             | 1.77        |
| 11-cis-retinal                                         | 0.03±0.007            | 0.06±0.04                  | 0.02    | 0.04             | 2.51        |

| Metabolites                                                                                               | Average (Control) (%) | Average (GBH-exposed) (%) | p-value | Adjusted p-value | Fold Change |
|-----------------------------------------------------------------------------------------------------------|-----------------------|---------------------------|---------|------------------|-------------|
| [SP]Sphinganine-1-phosphate                                                                               | 0.01±0.004            | 0.006±0.002               | 0.02    | 0.04             | 0.53        |
| [FA(20:4)]17R_18S-epoxy-5Z_8Z_11Z_14Z-eicosatetraenoic acid                                               | 0.01±0.003            | 0.02±0.009                | 0.02    | 0.04             | 1.89        |
| L-gamma-Glutamyl-L-hypoglycin                                                                             | 0.0002±0.0002         | 0.00002±0.000006          | 0.02    | 0.04             | 0.07        |
| (2S,4S)-4-Amino-2-hydroxy-2-methylpentanedioic acid                                                       | 0.002±0.0008          | 0.003±0.001               | 0.02    | 0.04             | 1.77        |
| (-)-bisdechlorogeodin                                                                                     | 0.0009±0.0003         | 0.0004±0.0003             | 0.02    | 0.04             | 0.45        |
| cyclandelate                                                                                              | 0.004±0.0006          | 0.005±0.002               | 0.02    | 0.04             | 1.45        |
| Ubiquinone-1(CoQ1)                                                                                        | 0.002±0.002           | 0.07±0.2                  | 0.03    | 0.03             | 42.43       |
| Pregna-4_9(11)-diene-3_20-dione                                                                           | 0.0007±0.0001         | 0.009±0.02                | 0.03    | 0.03             | 13.17       |
| Leukotriene B4 dimethylamide                                                                              | 0.0007±0.0002         | 0.001±0.0006              | 0.03    | 0.03             | 1.91        |
| Indole-3-ethanol                                                                                          | 0.0005±0.0003         | 0.002±0.001               | 0.03    | 0.03             | 4.22        |
| D-Proline                                                                                                 | 0.2±0.2               | 0.6±0.2                   | 0.03    | 0.03             | 3.64        |
| Citric acid                                                                                               | 0.4±0.2               | 0.2±0.2                   | 0.03    | 0.03             | 0.48        |
| cis-3-Hexenyl phenylacetate                                                                               | 0.007±0.002           | 0.02±0.01                 | 0.03    | 0.04             | 2.36        |
| CALYCANTHINE                                                                                              | 0.0001±0.0001         | 0.0004±0.0004             | 0.03    | 0.04             | 3.03        |
| Boldione                                                                                                  | 0.002±0.001           | 0.007±0.007               | 0.03    | 0.04             | 3.21        |
| androstenol                                                                                               | 0.0003±0.0002         | 0.001±0.001               | 0.03    | 0.04             | 4.82        |
| 2-Isobutoxynaphthalene                                                                                    | 0.007±0.002           | 0.01±0.004                | 0.03    | 0.04             | 1.51        |
| 2,6-Di-iso-propylnaphthalene                                                                              | 0.002±0.0003          | 0.003±0.0008              | 0.03    | 0.04             | 1.64        |
| 2-(acetylamino)-3-(1H-indol-3-yl)propanoic acid                                                           | 0.001±0.0005          | 0.0007±0.0003             | 0.03    | 0.04             | 0.53        |
| 1-Carbapen-2-em-3-carboxylic acid                                                                         | 0.01±0.01             | 0.03±0.02                 | 0.03    | 0.04             | 2.90        |
| 11-cis-Retinol                                                                                            | 0.02±0.005            | 0.01±0.003                | 0.03    | 0.04             | 0.66        |
| 1,5-DAN                                                                                                   | 0.04±0.02             | 0.07±0.01                 | 0.03    | 0.04             | 1.57        |
| 1,1,6-Trimethyl-1,2-dihydronaphthalene                                                                    | 0.001±0.001           | 0.0002±0.00008            | 0.03    | 0.04             | 0.13        |
| [ST(2:0)]androstan-3beta_17beta-diol                                                                      | 0.0004±0.0003         | 0.001±0.0009              | 0.03    | 0.04             | 3.20        |
| Agomelatine                                                                                               | 0.0004±0.0004         | 0.0001±0.00009            | 0.03    | 0.04             | 0.24        |
| (2E)-2-(hydroxymethyl)-3-[3-oxo-5-(propan-2-yl)-1,3,4,5,6,7-hexahydro-2-benzofuran-4-yl]prop-2-enoic acid | 0.004±0.001           | 0.002±0.0006              | 0.03    | 0.04             | 0.57        |
| Pinidine                                                                                                  | 0.0008±0.0008         | 0.00001±0.000002          | 0.04    | 0.04             | 0.02        |
| (S)-2-hydrazino-3-(4-hydroxy-3-methoxyphenyl)-2-methylpropionic acid                                      | 0.00002±0.00001       | 0.00004±0.00002           | 0.04    | 0.04             | 2.13        |
| (R)-2-Methylimino-1-phenylpropan-1-ol                                                                     | 0.0001±0.00007        | 0.0006±0.0003             | 0.04    | 0.04             | 5.80        |

| Metabolites    | Average<br>(Control) (%) | Average (GBH-<br>exposed) (%) | p-<br>value | Adjusted<br>p-value | Fold<br>Change |
|----------------|--------------------------|-------------------------------|-------------|---------------------|----------------|
| 3-Oxalomalate* | 0.00206±0.0005           | 0.002±0.0003                  | 0.04        | 0.04                | 1.21           |

\*Male rat subgroup

**Supplementary Table S4:** List of DEMs in the combined rat group validated by LC-PRM-MS including m/z, and fold change (FC) for the cull scan and PRM validation.

| Metabolites                                                 | m/z      | Transition ion fragments   | FC (Full scan) | Log2FC (Full scan) | FC (PRM) | Log2FC (PRM) |
|-------------------------------------------------------------|----------|----------------------------|----------------|--------------------|----------|--------------|
| Xanthine                                                    | 153.0404 | 154.0494,153.0655,155.0527 | 0.52           | -0.93              | 0.47     | -1.10        |
| Dihydrokavain                                               | 233.1169 | 215.1789,205.0642,91.0540  | 1.05           | 0.08               | 17.94    | 4.17         |
| Choline                                                     | 104.1065 | 104.1067,105.1101,103.0387 | 1.20           | 0.26               | 1.30     | 0.38         |
| Paraxanthine                                                | 181.0718 | 181.0715,171.0131,152.9397 | 1.23           | 0.30               | 1.33     | 0.42         |
| Fenestrel                                                   | 245.1533 | 163.1479,83.0854,121.1010  | 1.26           | 0.34               | 1.36     | 0.44         |
| 5-Methylcytosine                                            | 126.0658 | 126.0658,127.0386,83.0602  | 1.39           | 0.47               | 1.10     | 0.14         |
| 235BBF3K97                                                  | 269.2260 | 269.2257,157.1009,199.1477 | 1.43           | 0.51               | 1.53     | 0.61         |
| Falcarindiol                                                | 261.1846 | 91.0540,121.1009,244.1323  | 1.44           | 0.52               | 1.17     | 0.22         |
| Promegestone                                                | 327.2315 | 171.1164,185.1320,213.1632 | 1.47           | 0.56               | 1.19     | 0.26         |
| Rishitin                                                    | 223.1688 | 167.0852,195.0800,223.1476 | 1.48           | 0.56               | 1.89     | 0.92         |
| [FA(20:4)]17R_18S-epoxy-5Z_8Z_11Z_14Z-eicosatetraenoic acid | 319.2263 | 81.0698,318.2139,139.1114  | 1.52           | 0.60               | 1.04     | 0.06         |
| VIRILON                                                     | 413.3051 | 57.0700,67.0542,367.2984   | 1.52           | 0.61               | 1.24     | 0.31         |
| R.g.-Keto III                                               | 629.4563 | 325.1884,119.0853,335.1884 | 1.54           | 0.62               | 1.41     | 0.50         |
| D-Glutamate                                                 | 148.0601 | 84.0442,130.0496,102.0547  | 1.58           | 0.66               | 2.39     | 1.26         |
| Glycerol                                                    | 93.0543  | 62.9900, 72.9370, 91.0540  | 1.61           | 0.69               | 1.65     | 0.72         |
| 12-oxo Phytodienoic Acid                                    | 293.2109 | 81.0697,95.0853,262.1253   | 1.62           | 0.70               | 1.34     | 0.42         |
| oxeladin                                                    | 336.2530 | 308.8992,271.2049,95.0853  | 1.63           | 0.70               | 3.22     | 1.69         |
| Diethyl phthalate                                           | 223.0963 | 149.0230,73.0646,172.1116  | 1.70           | 0.76               | 2.41     | 1.27         |
| dehydroretinaldehyde                                        | 283.2055 | 252.1143,283.2051,176.1429 | 1.71           | 0.78               | 1.25     | 0.32         |
| cis-3-Hexenyl phenylacetate                                 | 219.1376 | 219.1740,91.0541,119.0853  | 1.96           | 0.97               | 1.19     | 0.25         |
|                                                             |          |                            |                |                    |          |              |

| Metabolites                                      | m/z      | Transition ion fragments   | FC (Full scan) | Log2FC (Full scan) | FC (PRM) | Log2FC (PRM) |
|--------------------------------------------------|----------|----------------------------|----------------|--------------------|----------|--------------|
| (+/-)-6-Hydroxy-3-oxo-alpha-ionone               | 223.1326 | 223.1476,167.0852,195.0800 | 2.00           | 1.00               | 4.66     | 2.22         |
| Auraptene                                        | 299.1643 | 283.2050,171.1163,131.0852 | 2.07           | 1.05               | 5.21     | 2.38         |
| D-Arginine                                       | 175.1186 | 177.0605,175.1185,70.065   | 2.10           | 1.07               | 3.07     | 1.62         |
| 3alpha_11beta-Dihydroxy-5alpha-androstane-17-one | 307.2267 | 81.0697,67.0542,95.0853    | 2.12           | 1.08               | 4.43     | 2.15         |
| L-N2-(2-Carboxyethyl)arginine                    | 247.1399 | 175.1185,188.0912,247.1395 | 2.24           | 1.16               | 2.58     | 1.37         |
| Forskolin                                        | 411.2355 | 154.1219,63.8566,251.1407  | 2.36           | 1.24               | 4.14     | 2.05         |
| [FA(20:4)]5Z_8Z_11Z_14Z-eicosatetraenoic acid    | 305.2468 | 221.1531,121.1009,93.0697  | 2.82           | 1.50               | 1.22     | 0.29         |
| 4-Hydroxy-3-(sulfooxy)benzoic acid               | 234.9896 | 151.9762,179.9710,133.9657 | 2.87           | 1.52               | 6.22     | 2.64         |
| L-(+)-Arginine                                   | 175.1186 | 177.0605,175.1185,70.065   | 3.03           | 1.61               | 3.07     | 1.62         |
| 19-Oxoandrost-4-ene-3_17-dione                   | 301.1796 | 283.2053,255.2105,117.0696 | 3.35           | 1.75               | 2.40     | 1.26         |
| N_N-Dimethylsphing-4-enine                       | 328.3209 | 291.2313,96.9949,69.0698   | 3.62           | 1.85               | 1.81     | 0.85         |
| sulbenox                                         | 211.0534 | 211.0530,198.9713,203.9379 | 3.98           | 1.99               | 3.85     | 1.94         |
| DAPSONE HYDROXYLAMINE                            | 265.0639 | 232.1331,207.1011,139.1008 | 4.81           | 2.26               | 5.14     | 2.36         |
| Diethanolamine                                   | 106.0859 | 104.1068,105.0031,60.0809  | 5.33           | 2.42               | 52.05    | 5.70         |
| Androst-4-en-3-one                               | 273.2209 | 138.5293,165.1270,273.2206 | 6.57           | 2.72               | 5.75     | 2.52         |
| (2S)-Flavan-4-ol                                 | 227.1063 | 121.1009,149.0119,203.9380 | 18.45          | 4.21               | 8.82     | 3.14         |
| Ubiquinone-1(CoQ1)                               | 251.1274 | 205.1219,250.1770,233.1166 | 22.09          | 4.47               | 42.91    | 5.42         |

**Supplementary Table S5:** List of DEMs in the female group validated by LC-PRM-MS including m/z, transition fragment ions, and fold change (FC) for the full scan and PRM validation.

| Metabolites                                                          | m/z      | Transition ion fragments   | FC (Full scan) | Log2FC (Full scan) | FC (PRM) | Log2FC (PRM) |
|----------------------------------------------------------------------|----------|----------------------------|----------------|--------------------|----------|--------------|
| S-3-oxodecanoyl cysteamine                                           | 246.1520 | 244.2629,226.2523,58.0653  | 0.03           | 0.04               | -5.17    | -4.79        |
| butalbital                                                           | 225.1229 | 148.0213,224.0371,143.0012 | 0.03           | 0.05               | -4.86    | -4.21        |
| CYCLO(-SER-TYR)                                                      | 251.1023 | 193.0835,174.0545,94.0650  | 0.08           | 0.35               | -3.69    | -1.53        |
| 2-(acetylamino)-3-(1H-indol-3-yl)propanoic acid                      | 247.1075 | 247.0859,159.0913,188.0701 | 0.53           | 0.54               | -0.92    | -0.88        |
| (-)-bisdechlorogeodin                                                | 331.0812 | 119.0853,331.0804,159.1164 | 0.45           | 0.67               | -1.15    | -0.59        |
| [SP]Sphinganine-1-phosphate                                          | 382.2715 | 265.2713,82.0649,365.1780  | 0.53           | 0.69               | -0.93    | -0.53        |
| L-gamma-Glutamyl-L-leucine                                           | 261.1442 | 187.1476,244.1323,91.0540  | 0.01           | 0.71               | -6.12    | -0.49        |
| Epinephrine(OrL-Adrenaline)                                          | 184.0966 | 159.9907,155.0699,147.9740 | 0.29           | 0.78               | -1.76    | -0.36        |
| [FA(20:4)]17R_18S-epoxy-5Z_8Z_11Z_14Z-eicosatetraenoicacid           | 319.2263 | 81.0698,318.2139,139.1114  | 1.89           | 1.03               | 0.92     | 0.04         |
| dehydroretinaldehyde                                                 | 283.2055 | 252.1143,283.2051,176.1429 | 1.93           | 1.09               | 0.95     | 0.13         |
| Promegestone                                                         | 327.2315 | 171.1164,185.1320,213.1632 | 1.53           | 1.12               | 0.62     | 0.16         |
| 11-cis-retinal                                                       | 285.2210 | 285.2205,267.2100,183.1164 | 2.51           | 1.15               | 1.33     | 0.20         |
| Norethindrone                                                        | 299.2002 | 299.1998,253.1944,131.0852 | 6.78           | 1.18               | 2.76     | 0.24         |
| Falcarindiol                                                         | 261.1846 | 91.0540,121.1009,244.1323  | 1.46           | 1.20               | 0.55     | 0.26         |
| Guaiazulene                                                          | 199.1477 | 60.0445,198.1848,106.9635  | 1.68           | 1.25               | 0.75     | 0.32         |
| D-Proline                                                            | 116.0701 | 70.0650,116.0704,118.0860  | 3.64           | 1.26               | 1.86     | 0.34         |
| cis-3-Hexenyl phenylacetate                                          | 219.1376 | 219.1740,91.0541,119.0853  | 2.36           | 1.31               | 1.24     | 0.39         |
| Boldione                                                             | 285.1847 | 285.2205,267.2100,183.1164 | 3.21           | 1.45               | 1.68     | 0.54         |
| Paraxanthine                                                         | 181.0718 | 181.0715,171.0131,152.9397 | 2.31           | 1.60               | 1.21     | 0.68         |
| Homoarginine                                                         | 189.1342 | 173.0294,145.0349,130.0860 | 1.27           | 1.61               | 0.35     | 0.69         |
| 2'_4'-Dihydroxyacetophenone                                          | 153.0543 | 153.0542,126.0625,112.0471 | 1.77           | 1.62               | 0.83     | 0.70         |
| (S)-2-hydrazino-3-(4-hydroxy-3-methoxyphenyl)-2-methylpropionic acid | 241.1181 | 107.0700,133.0857,89.0596  | 2.13           | 1.62               | 1.09     | 0.70         |
| (2S,4S)-4-Amino-2-hydroxy-2-methylpentanedioic acid                  | 178.0707 | 114.0547,132.0652,96.0442  | 1.77           | 1.62               | 0.83     | 0.70         |
| N_N-Dimethylsphing-4-enine                                           | 328.3209 | 291.2313,96.9949,69.0698   | 4.73           | 1.68               | 2.24     | 0.75         |
| GibberellinA14                                                       | 349.2008 | 331.2260,133.1009,271.2054 | 4.32           | 1.81               | 2.11     | 0.86         |

| Metabolites                           | m/z      | Transition ion fragments   | FC<br>(Full<br>scan) | Log2FC<br>(Full<br>scan) | FC<br>(PRM) | Log2FC<br>(PRM) |
|---------------------------------------|----------|----------------------------|----------------------|--------------------------|-------------|-----------------|
| GibberellinA12                        | 333.2059 | 189.1269,253.1944,299.1998 | 3.45                 | 1.87                     | 1.79        | 0.90            |
| Hydroxyanthraquinone                  | 225.0543 | 225.1482,207.1375,189.1633 | 1.84                 | 2.15                     | 0.88        | 1.10            |
| N1-Methyl-2-pyridone-5-carboxamide    | 153.0655 | 80.9448,100.8959,100.8959  | 2.39                 | 2.30                     | 1.26        | 1.20            |
| Rishitin                              | 223.1688 | 167.0852,195.0800,223.1476 | 1.70                 | 2.50                     | 0.77        | 1.32            |
| 1-Carbapen-2-em-3-carboxylicacid      | 154.0495 | 154.0494,72.9369,120.9607  | 2.90                 | 2.62                     | 1.54        | 1.39            |
| azarole                               | 237.1121 | 207.1373,195.1374,181.0855 | 1.53                 | 3.01                     | 0.61        | 1.59            |
| L-N2-(2-Carboxyethyl)arginine         | 247.1399 | 175.1185,188.0912,247.1395 | 2.51                 | 3.07                     | 1.33        | 1.62            |
| cyclandelate                          | 277.1798 | 223.0748,277.1768,81.0697  | 1.45                 | 3.18                     | 0.54        | 1.67            |
| (R)-2-Methylimino-1-phenylpropan-1-ol | 164.1068 | 163.0750,136.9580,141.9559 | 5.80                 | 3.59                     | 2.54        | 1.84            |
| D-Arginine                            | 175.1186 | 177.0605,175.1185,70.065   | 2.48                 | 3.74                     | 1.31        | 1.90            |
| L-(+)-Arginine                        | 175.1186 | 177.0605,175.1185,70.065   | 3.09                 | 3.74                     | 1.63        | 1.90            |
| Androstenedione                       | 287.2004 | 118.1223,83.0853,270.2421  | 2.60                 | 4.27                     | 1.38        | 2.09            |
| 4-Hydroxy-3-(sulfooxy)benzoic acid    | 234.9896 | 151.9762,179.9710,133.9657 | 2.54                 | 5.87                     | 1.34        | 2.55            |
| Thebaine                              | 312.1593 | 296.2213,91.0540,159.1162  | 1.79                 | 8.42                     | 0.84        | 3.07            |
| Piperonyl sulfoxide                   | 325.1830 | 179.0851,223.0591,325.2164 | 8.11                 | 9.07                     | 3.02        | 3.18            |
| Androst-4-en-3-one                    | 273.2209 | 138.5293,165.1270,273.2206 | 9.82                 | 9.68                     | 3.30        | 3.28            |
| androstenol                           | 275.2368 | 274.2734,104.1068,149.5484 | 4.82                 | 11.61                    | 2.27        | 3.54            |
| (2S)-Flavan-4-ol                      | 227.1063 | 121.1009,149.0119,203.9380 | 22.93                | 14.12                    | 4.52        | 3.82            |
| Nobiletin                             | 403.1383 | 375.0258,188.0703,259.1683 | 22.41                | 21.69                    | 4.49        | 4.44            |
| Dihydrokavain                         | 233.1169 | 215.1789,205.0642,91.0540  | 2.57                 | 23.70                    | 1.36        | 4.57            |
| Ubiquinone-1(CoQ1)                    | 251.1274 | 205.1219,250.1770,233.1166 | 42.43                | 72.64                    | 5.41        | 6.18            |

**Supplementary Table S6:** List of DEMs shown to be implicated in some important diseases and functions based on IPA results.

| <b>Combined group</b>  |                              |                    |                  |
|------------------------|------------------------------|--------------------|------------------|
| <b>Metabolites</b>     | <b>p-values <sup>1</sup></b> | <b>Fold Change</b> | <b>AUC Value</b> |
| Choline                | 0.01                         | 1.20               | 0.80             |
| D-Arginine             | 0.02                         | 2.10               | 0.77             |
| L-(+)-Arginine         | 0.02                         | 3.03               | 0.83             |
| Glycerol               | 0.02                         | 1.61               | 0.79             |
| Paraxanthine           | 0.03                         | 1.23               | 0.76             |
| Xanthine               | 0.04                         | 0.52               | 0.75             |
| <b>Female subgroup</b> |                              |                    |                  |
| Paraxanthine           | 0.007                        | 2.31               | 0.95             |
| L-(+)-Arginine         | 0.01                         | 3.09               | 0.93             |
| Epinephrine            | 0.01                         | 0.29               | 0.93             |
| D-Arginine             | 0.02                         | 2.48               | 0.91             |
| Androstenedione        | 0.02                         | 2.60               | 0.88             |



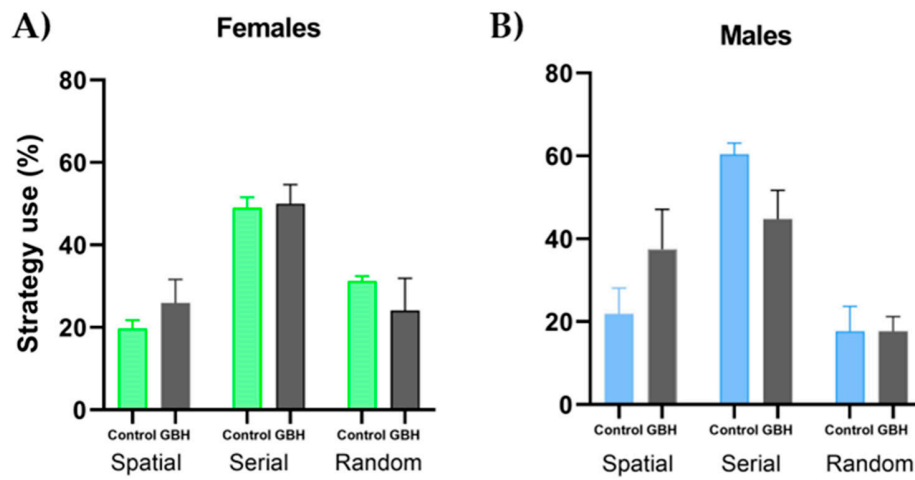

**Supplementary Figure S1.** Effect of chronic exposure to GBH on search strategy of A) females and B) males studied on Barnes maze (n = 6 - 7 rats/group). Results are presented as mean  $\pm$  SEM.

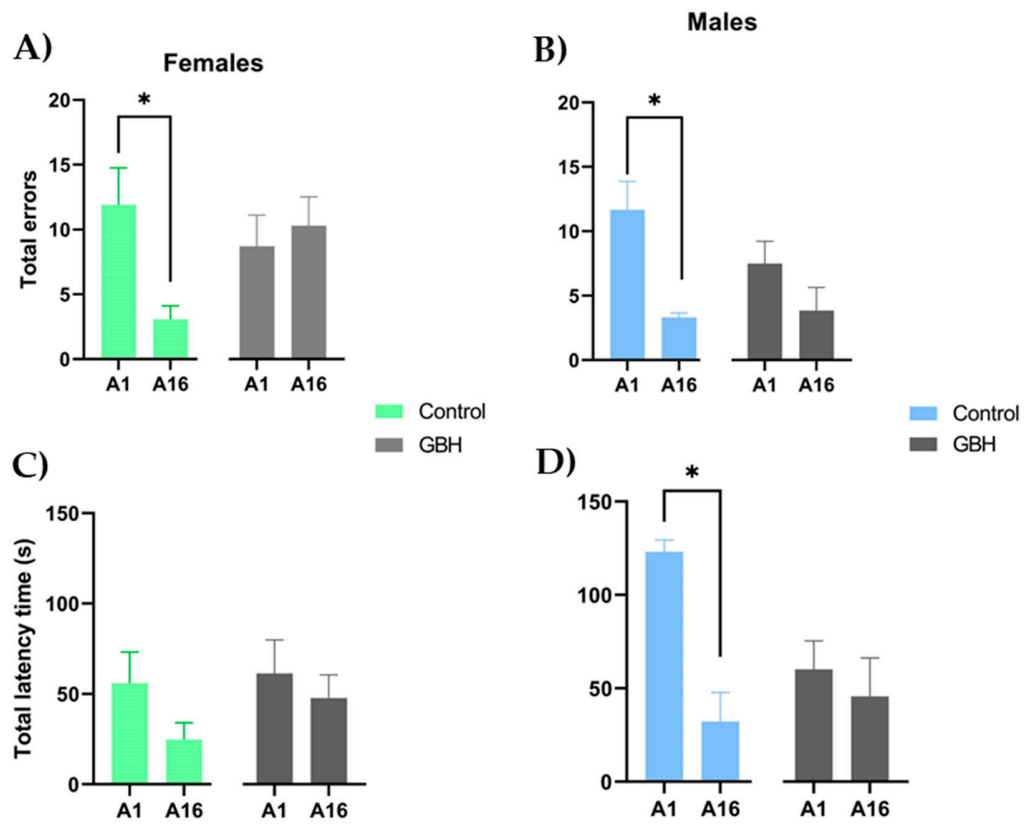

**Supplementary Figure S2.** Effect of chronic exposure to GBH on total errors A and B) and latency C and D) to solve the Barnes maze in rats ( $n = 6 - 7$  rats/group). Results are presented as mean  $\pm$  SEM. \* $p < 0.05$ .

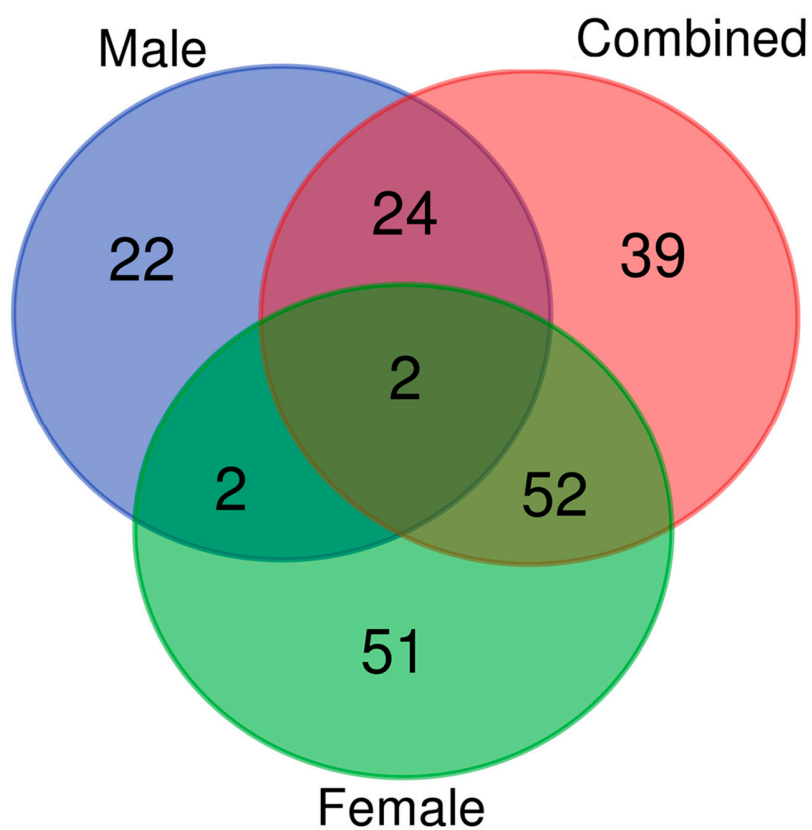

**Supplementary Figure S3.** Venn diagram shows overlapping and unique significant metabolites in the whole data set and gender comparison between control and GBH-exposed rats. The orange circle represents the significant metabolites in the combined comparison, while the blue and green circles represent the significant metabolites in the male and female comparisons respectively. The result shows 2 common metabolites in all comparisons, with 39, 22 and 51 unique significant metabolites in the combined, male and female comparisons respectively.

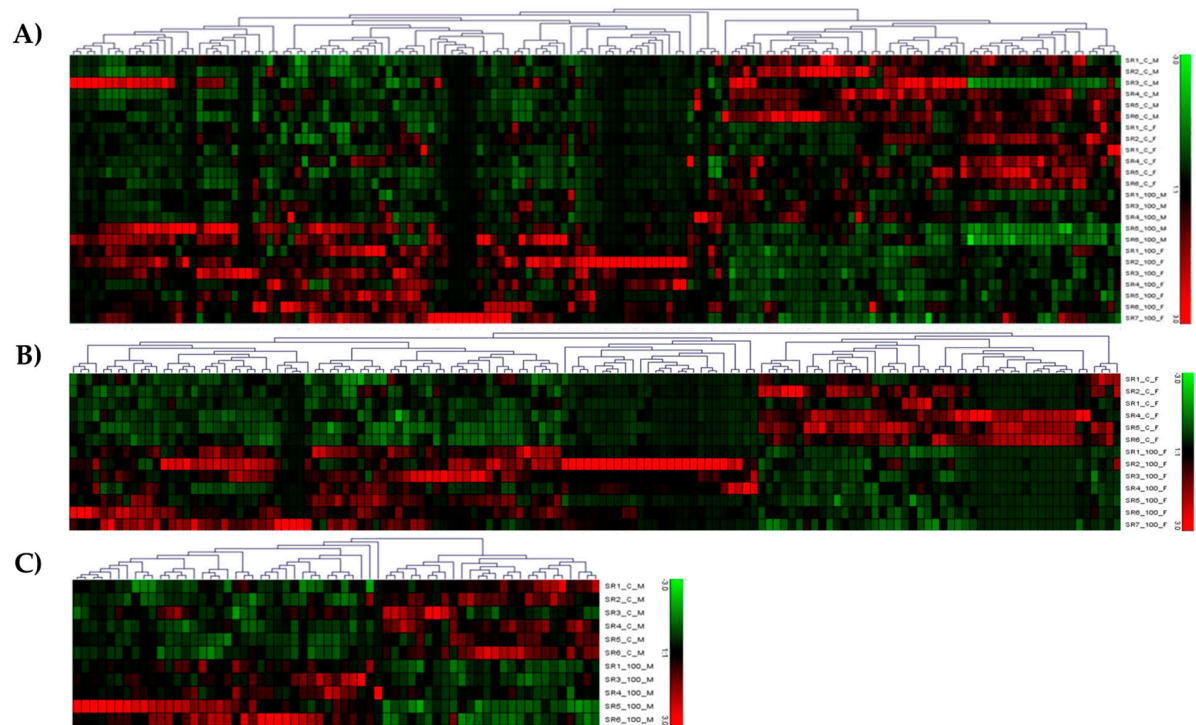

**Supplementary Figure S4.** Heatmap of significant metabolites in **A)** control and GBH-exposed groups in the combined sample group, **B)** female rat samples, and **C)** male rat samples (C\_M = Control (male); C\_F = Control (female); 100\_M = GBH-exposed (male); 100\_F = GBH-exposed (female)). The red color indicates up regulated while the green color indicates down regulated metabolites.

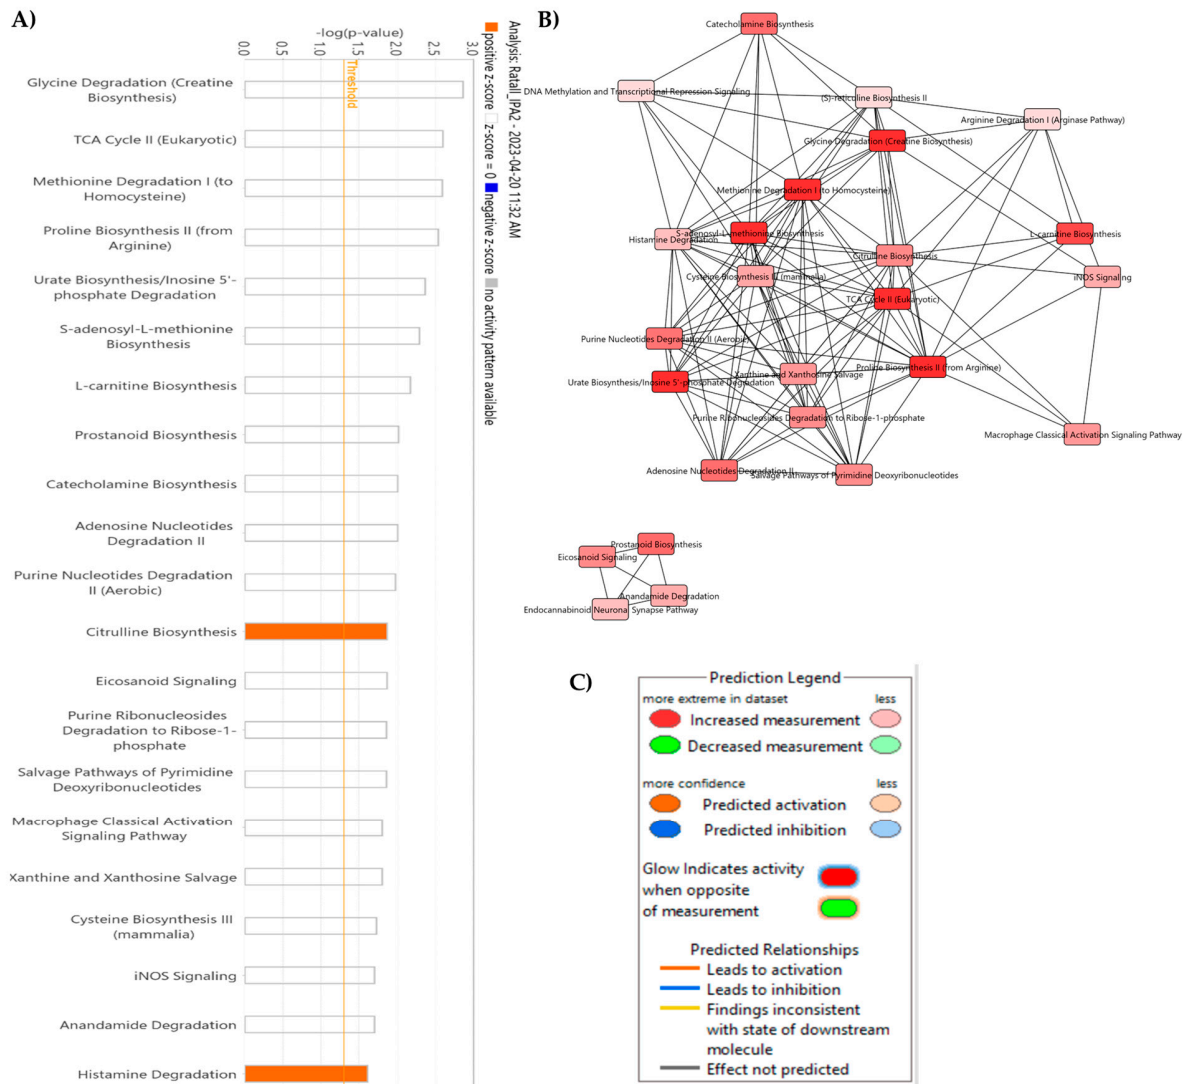

**Supplementary Figure S5.** A) Top Canonical pathways, B) Pathways network, C) Prediction legends. (Red indicates increased measurement, Green represents decreased measurement, Blue represents predicted inhibition, and Orange represents predicted activation).

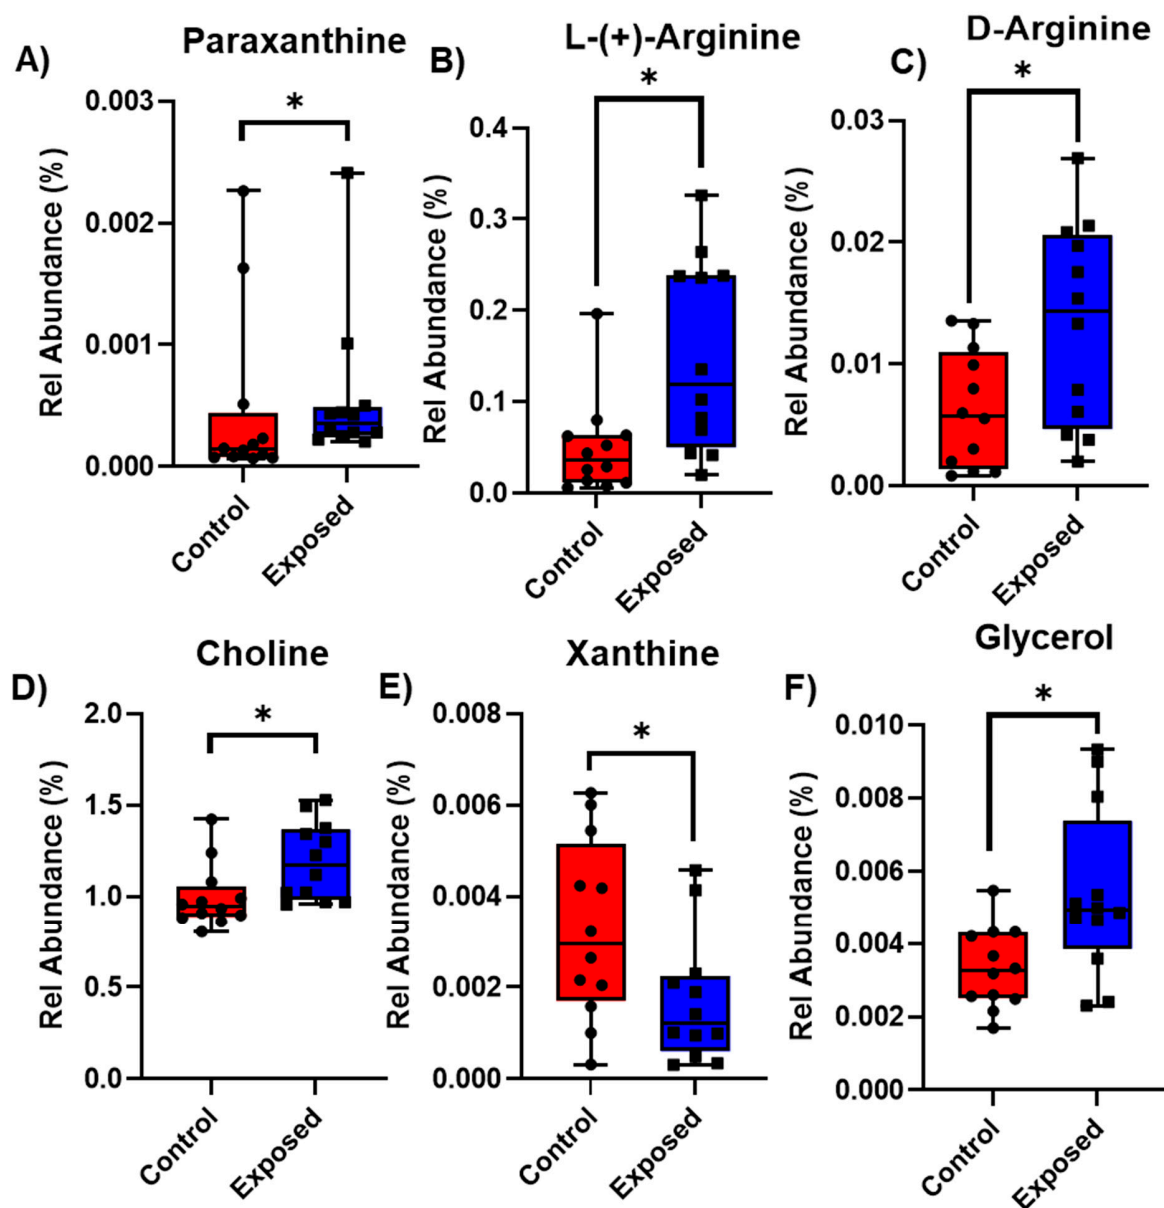

**Supplementary Figure S6:** Boxplot showing the changes in the DEMs from combined group comparison between control to GBH-exposed. Five metabolites were up regulated, and one metabolite was down regulated. A) Paraxanthine (Upregulated), B) L-(+)-Arginine (Upregulated), C) D-Arginine (Upregulated), D) Choline (Upregulated), E) Xanthine (Downregulated), F) Glycerol (Upregulated).

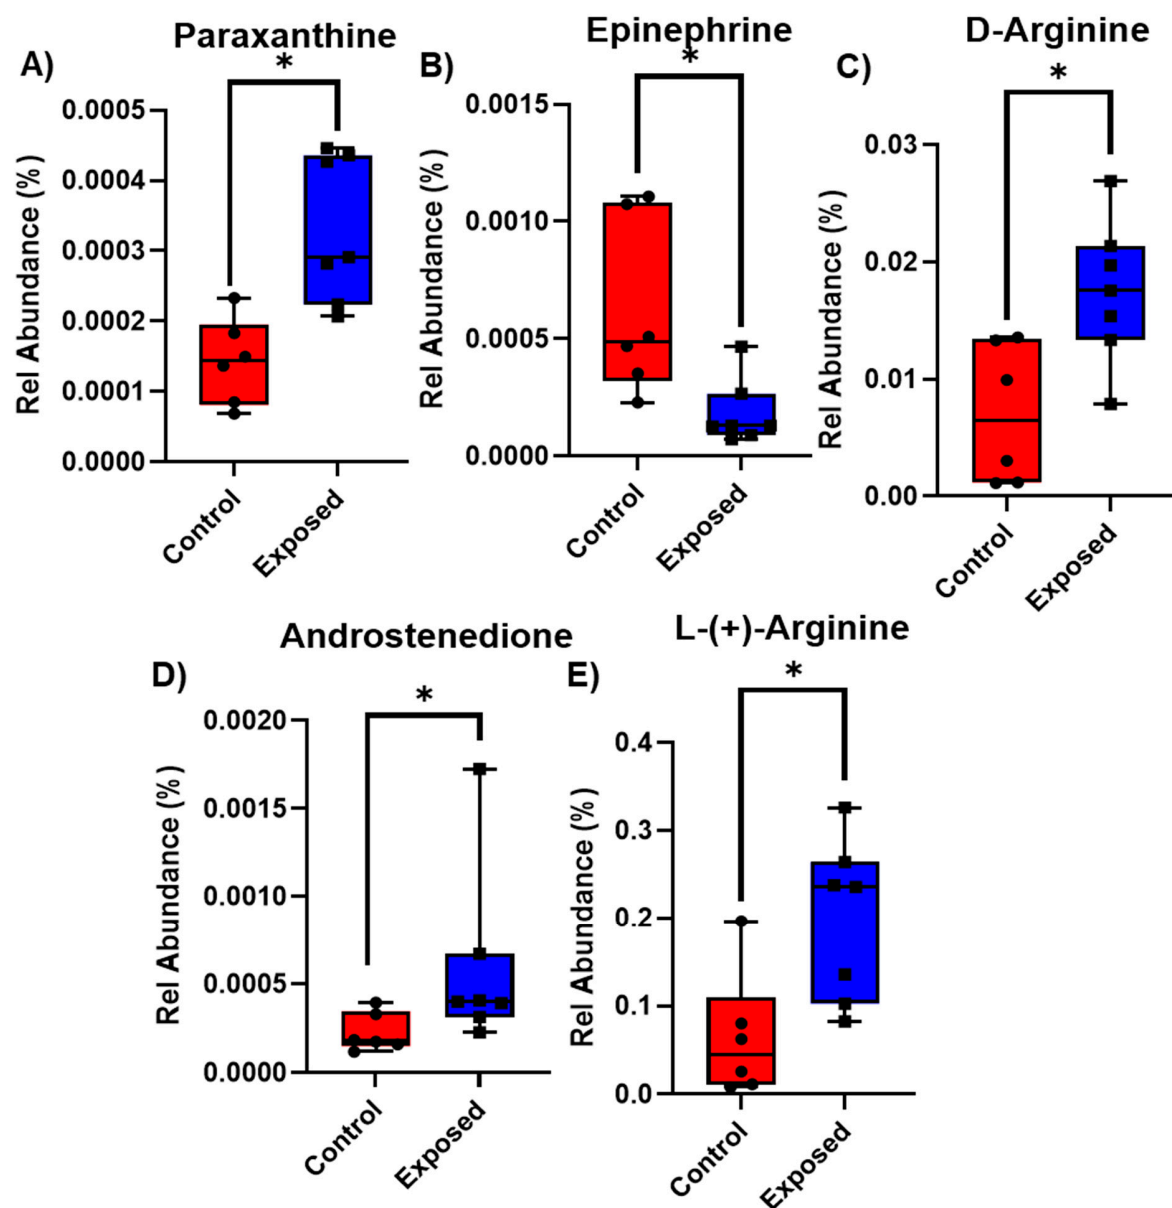

**Supplementary Figure S7.** Boxplot showing the changes in the control and GBH-exposed DEMs in female rats. Four metabolites were up regulated, and one metabolite was down regulated. A) Paraxanthine (Upregulated), B) Epinephrine (Downregulated), C) D-Arginine (Upregulated), D) Androstenedione (Upregulated), E) L-(+)-Arginine (Upregulated).
